# Supplementary material for: Super-Repellent Paper Coated with Electrospun Biopolymers and Electrosprayed Silica of Interest in Food Packaging Applications
Source: MDPI journal article supplement (doi:10.3390/nano11123354), 2021-12-10
Supplement: s1 [file s1]

# Super-Repellent Paper Coated with Electrospun Biopolymers and Electrosprayed Silica of Interest in Food Packaging Applications

Alvaro Lafraya <sup>1</sup>, Cristina Prieto <sup>1</sup>, Maria Pardo-Figuerez <sup>1,2</sup>, Alberto Chiva <sup>2</sup> and Jose M. Lagaron <sup>1,\*</sup>

<sup>1</sup> Novel Materials and Nanotechnology Group, Institute of Agrochemistry and Food Technology (IATA), Spanish Council for Scientific Research (CSIC), Calle Catedrático Agustín Escardino Benlloch 7, 46980 Paterna, Spain; alafraya@iata.csic.es (A.L.); cprieto@iata.csic.es (C.P.); mpardo@iata.csic.es (M.P.-F.)

<sup>2</sup> Bioinicia R&D Department, Bioinicia S.L., Calle Algepser 65, nave 3, 46980 Paterna, Spain; achiva@bioinicia.com

\* Correspondence: lagaron@iata.csic.es; Tel.: +34-963-900-022

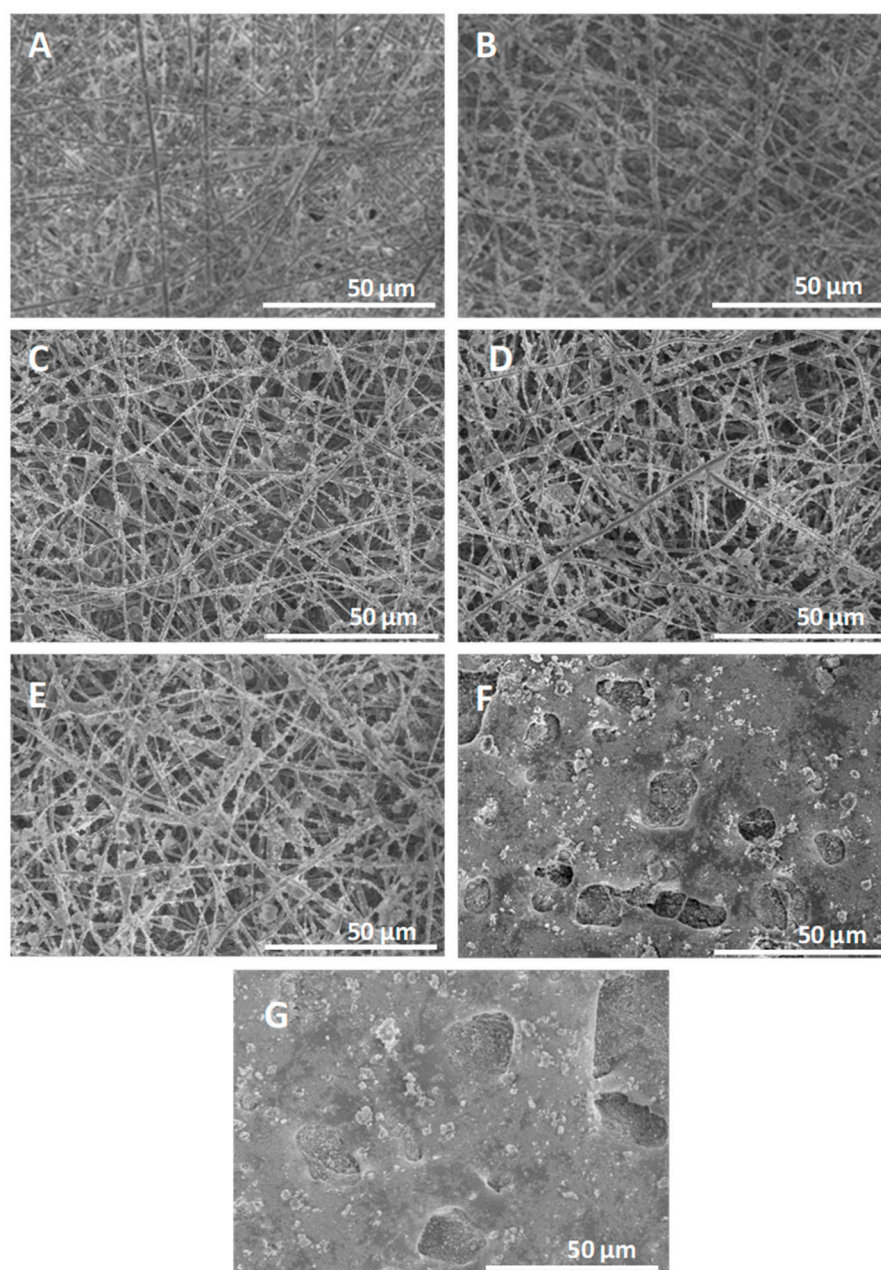

**Figure S1.** Field emission scanning electron microscope (FE-SEM) images of the multilayer structures based on paper, electrospun polylactide (PLA) and electrosprayed hydrophobic silica microparticles (Paper/PLA/SiO<sub>2</sub>) at different annealing temperatures for 20 s. A: No annealing; B: 130 °C; C: 140 °C; D: 150 °C; E: 160 °C; F: 170 °C; G: 180 °C.

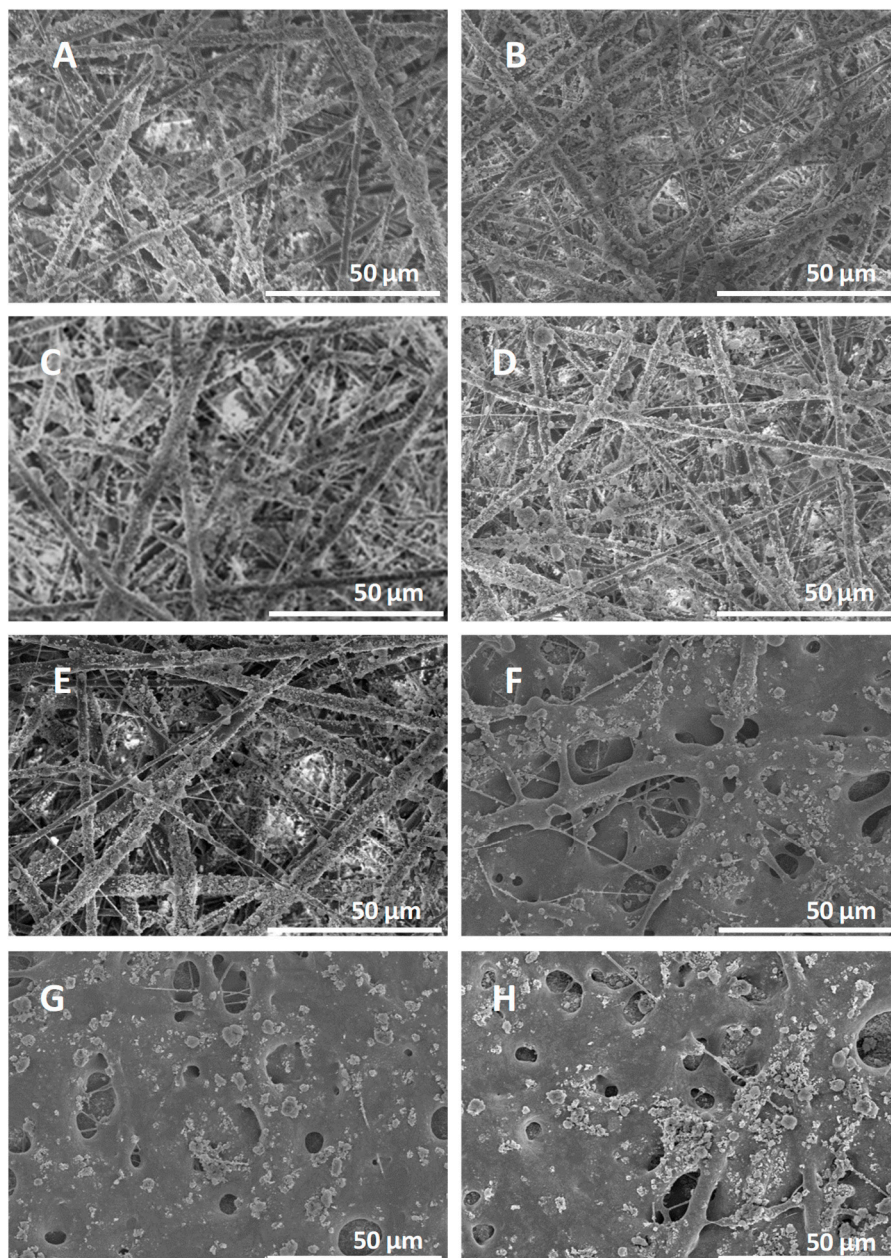

**Figure S2.** Field emission scanning electron microscope (FE-SEM) images of the multilayer structures based on paper, electrospun poly( $\epsilon$ -caprolactone) (PCL) and electrosprayed hydrophobic silica microparticles (Paper/PCL/SiO<sub>2</sub>) at different annealing temperatures for 20 s. A: No annealing; B: 40 °C; C: 45 °C; D: 50 °C; E: 55 °C; F: 60 °C; G: 65 °C; H: 70 °C.



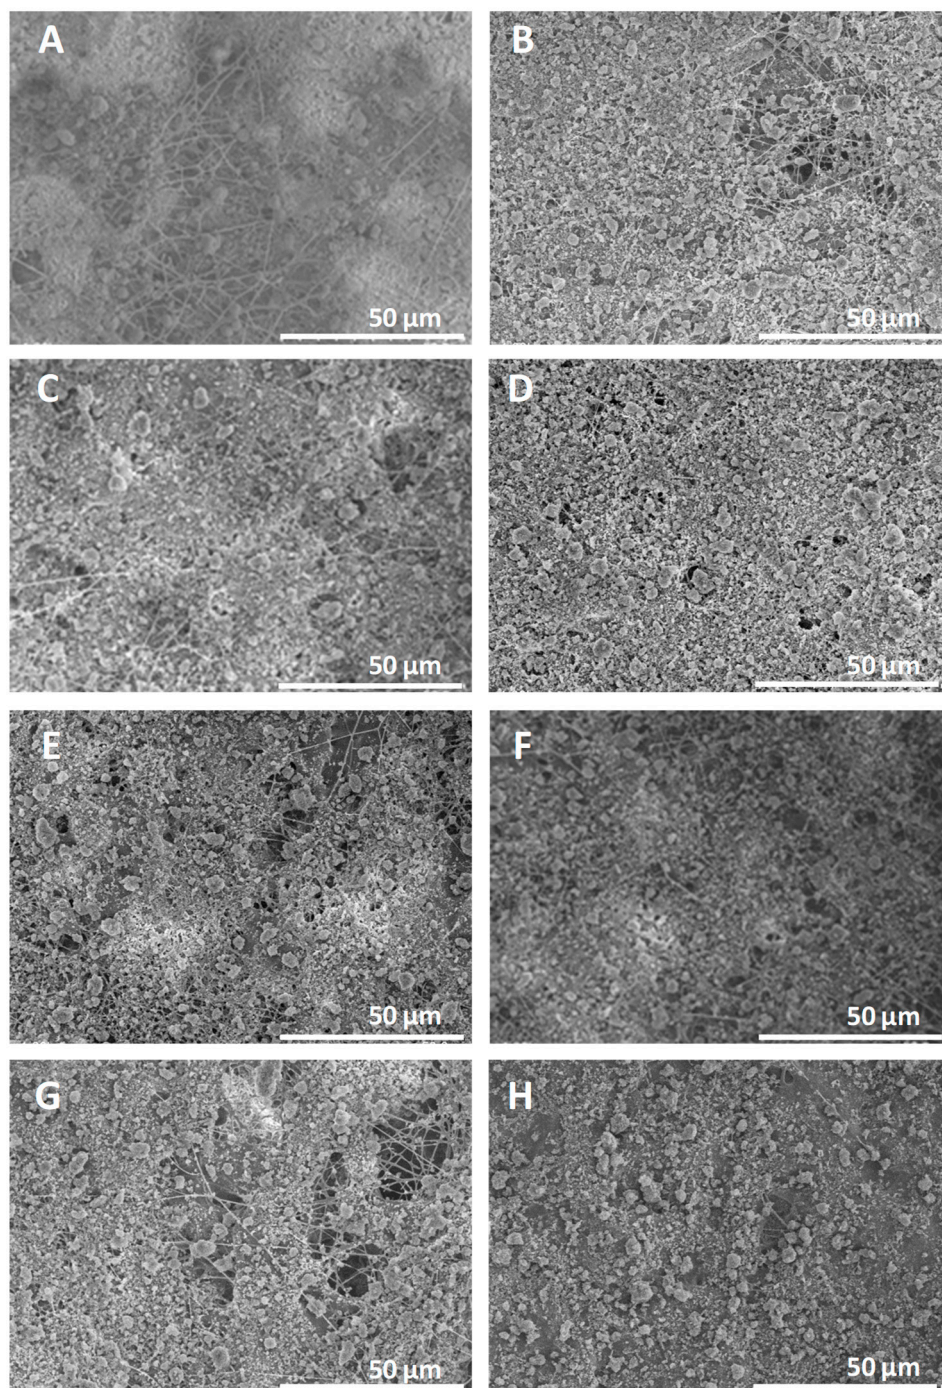

**Figure S3.** Field emission scanning electron microscope (FE-SEM) images of the multilayer structures based on paper, electrospun poly(3-hydroxybutyrate-co-3-hydroxy-valerate) (PHBV), and electrospayed hydrophobic silica microparticles (Paper/PHBV/SiO<sub>2</sub>) at different annealing temperatures for 20 s: A: No annealing; B: 90 °C; C: 100 °C; D: 110 °C; E: 120 °C; F: 130 °C; G: 140 °C; H: 150 °C.
